# Supplementary material for: Coordinated Regulation of Protoperithecium Development by MAP Kinases MAK-1 and MAK-2 in Neurospora crassa
Source: Front Microbiol. 2021 Nov 26;12:769615. doi: 10.3389/fmicb.2021.769615 (PMC8662359; doi:10.3389/fmicb.2021.769615)
Supplement: Supplementary file 3 [file Table_2.xlsx]

## Sheet: Sheet1
Supplementary Table S2
Table S2.Gene set enrichment analysis for genes reponded by sexual induction
Go enrichment of 2892 up-regulared genes
Category	Term	Count	%	PValue	Genes	List Total	Pop Hits	Pop Total	Fold Enrichment	Bonferroni	Benjamini	FDR
GOTERM_CC_DIRECT	GO:0005730~nucleolus	48	1.73285	6.99903e-06	NCU04159, NCU07547, NCU02428, NCU00981, NCU08668, NCU03066, NCU02406, NCU00919, NCU09843, NCU06021, NCU09380, NCU07956, NCU03133, NCU01257, NCU02546, NCU00151, NCU06090, NCU07331, NCU00404, NCU01502, NCU04150, NCU00812, NCU01524, NCU02066, NCU02640, NCU07712, NCU03380, NCU08553, NCU02748, NCU07041, NCU04439, NCU00092, NCU01301, NCU02675, NCU05293, NCU04787, NCU08595, NCU08121, NCU02159, NCU09528,…	1484	83	4489	1.74936	0.00249554	0.00249554	0.00960018
GOTERM_MF_DIRECT	GO:0030248~cellulose binding	17	0.613718	0.000106926	NCU05955, NCU09680, NCU09416, NCU08760, NCU02240, NCU09524, NCU02916, NCU07225, NCU07760, NCU07340, NCU00762, NCU00206, NCU00710, NCU09764, NCU05121, NCU00836, NCU05159	1587	21	4613	2.35308	0.0769686	0.0769686	0.162588
GOTERM_CC_DIRECT	GO:0005737~cytoplasm	232	8.37545	0.000672146	NCU04274, NCU06764, NCU05642, NCU06621, NCU00611, NCU00043, NCU04799, NCU03610, NCU02564, NCU06372, NCU04612, NCU06104, NCU06766, NCU06232, NCU04613, NCU00443, NCU07774, NCU05650, NCU00304, NCU04105, NCU10046, NCU02241, NCU05252, NCU02357, NCU00720, NCU02963, NCU06758, NCU07365, NCU01198, NCU02688, NCU09465, NCU00317, NCU00410, NCU03731, NCU03117, NCU02382, NCU02380, NCU04775, NCU09364, NCU00415,…	1484	593	4489	1.18345	0.213401	0.113096	0.918056
GOTERM_CC_DIRECT	GO:0005829~cytosol	77	2.77978	0.00100088	NCU09489, NCU06578, NCU01083, NCU03526, NCU01669, NCU00963, NCU00519, NCU04797, NCU03813, NCU08040, NCU04790, NCU06625, NCU04936, NCU03084, NCU09545, NCU07574, NCU00950, NCU02156, NCU05298, NCU06996, NCU04104, NCU09873, NCU07941, NCU07361, NCU10106, NCU00651, NCU05050, NCU05983, NCU04728, NCU04569, NCU02657, NCU02055, NCU05979, NCU00065, NCU00319, NCU04309, NCU01013, NCU07458, NCU06783, NCU06785,…	1484	171	4489	1.3621	0.300573	0.112338	1.36421
GOTERM_CC_DIRECT	GO:0030687~preribosome, large subunit precursor	19	0.685921	0.0012251	NCU07547, NCU00981, NCU01301, NCU06214, NCU11261, NCU07942, NCU08121, NCU07795, NCU01257, NCU00105, NCU04503, NCU00404, NCU04150, NCU00925, NCU02640, NCU03764, NCU02477, NCU01458, NCU09094	1484	29	4489	1.98185	0.354434	0.103635	1.66745
GOTERM_CC_DIRECT	GO:0005666~DNA-directed RNA polymerase III complex	13	0.469314	0.00168456	NCU02533, NCU00727, NCU01245, NCU01785, NCU08030, NCU03560, NCU04508, NCU01772, NCU00419, NCU05305, NCU11012, NCU06539, NCU07656	1484	17	4489	2.31318	0.452228	0.113416	2.28613
GOTERM_MF_DIRECT	GO:0004553~hydrolase activity, hydrolyzing O-glycosyl compounds	33	1.19134	0.00185465	NCU09652, NCU01900, NCU00061, NCU05104, NCU09486, NCU09904, NCU05955, NCU05956, NCU04854, NCU04674, NCU09416, NCU08760, NCU07760, NCU06730, NCU00810, NCU04203, NCU02583, NCU00710, NCU09764, NCU00836, NCU05789, NCU09680, NCU02240, NCU04885, NCU09524, NCU02916, NCU07326, NCU00206, NCU04431, NCU06861, NCU05159, NCU05057, NCU07190	1587	60	4613	1.59871	0.75103	0.501031	2.78534
GOTERM_CC_DIRECT	GO:0032040~small-subunit processome	20	0.722022	0.0019079	NCU01331, NCU04159, NCU07041, NCU02748, NCU02428, NCU03628, NCU03794, NCU01008, NCU03051, NCU03396, NCU04243, NCU03133, NCU03018, NCU01022, NCU06943, NCU07331, NCU05894, NCU01502, NCU01367, NCU03952	1484	32	4489	1.89058	0.49428	0.107411	2.58557
GOTERM_BP_DIRECT	GO:0006383~transcription from RNA polymerase III promoter	11	0.397112	0.00240727	NCU02533, NCU00727, NCU01245, NCU08030, NCU03560, NCU04508, NCU01772, NCU00419, NCU05305, NCU11012, NCU06539	1357	13	3887	2.42373	0.886549	0.886549	3.68871
GOTERM_BP_DIRECT	GO:0005975~carbohydrate metabolic process	57	2.05776	0.00361016	NCU09652, NCU01900, NCU00087, NCU09486, NCU05955, NCU05956, NCU09416, NCU07860, NCU08760, NCU04798, NCU07760, NCU06730, NCU00130, NCU02997, NCU00810, NCU09582, NCU00710, NCU09764, NCU03086, NCU04936, NCU04554, NCU02240, NCU02916, NCU07326, NCU10107, NCU09508, NCU00762, NCU00206, NCU00720, NCU04623, NCU00890, NCU09647, NCU08179, NCU05159, NCU06211, NCU00061, NCU09904, NCU04674, NCU01393, NCU04395,…	1357	119	3887	1.37203	0.961836	0.804645	5.48383
GOTERM_MF_DIRECT	GO:0003899~DNA-directed RNA polymerase activity	18	0.649819	0.00382233	NCU08553, NCU01785, NCU03782, NCU01772, NCU00419, NCU06539, NCU09378, NCU06485, NCU02533, NCU00727, NCU01245, NCU07166, NCU01515, NCU03560, NCU04508, NCU05120, NCU05305, NCU11012	1587	28	4613	1.86862	0.943211	0.615625	5.66109
GOTERM_MF_DIRECT	GO:0030515~snoRNA binding	9	0.32491	0.00420928	NCU03628, NCU03794, NCU06943, NCU01008, NCU03396, NCU03051, NCU05894, NCU01367, NCU04243	1587	10	4613	2.61607	0.957549	0.546087	6.21717
GOTERM_CC_DIRECT	GO:0005665~DNA-directed RNA polymerase II, core complex	10	0.361011	0.00818054	NCU08553, NCU01515, NCU08030, NCU03782, NCU04508, NCU05120, NCU05305, NCU11012, NCU09378, NCU02589	1484	13	4489	2.32687	0.946734	0.342246	10.6558
GOTERM_BP_DIRECT	GO:0006810~transport	24	0.866426	0.00909084	NCU00316, NCU07263, NCU03556, NCU07574, NCU02363, NCU08278, NCU02423, NCU02352, NCU03710, NCU01689, NCU06717, NCU10034, NCU06922, NCU02802, NCU05649, NCU05068, NCU03800, NCU03561, NCU03863, NCU07738, NCU05390, NCU04003, NCU07736, NCU07478	1357	43	3887	1.59874	0.999738	0.935999	13.2737
GOTERM_BP_DIRECT	GO:0000462~maturation of SSU-rRNA from tricistronic rRNA transcript (SSU-rRNA, 5.8S rRNA, LSU-rRNA)	18	0.649819	0.0116519	NCU07041, NCU02748, NCU04159, NCU02428, NCU00092, NCU03628, NCU03794, NCU03051, NCU03907, NCU04787, NCU03018, NCU01022, NCU00151, NCU03824, NCU07331, NCU05894, NCU01502, NCU01503	1357	30	3887	1.71864	0.999975	0.929056	16.704
GOTERM_BP_DIRECT	GO:0001731~formation of translation preinitiation complex	11	0.397112	0.0119898	NCU06279, NCU02208, NCU05889, NCU07929, NCU01021, NCU07380, NCU00457, NCU02810, NCU07954, NCU03876, NCU09707	1357	15	3887	2.10056	0.999981	0.886783	17.1469
GOTERM_CC_DIRECT	GO:0005887~integral component of plasma membrane	52	1.87726	0.0147664	NCU02755, NCU00809, NCU03468, NCU05897, NCU04070, NCU03257, NCU10675, NCU05853, NCU08858, NCU08147, NCU09207, NCU03292, NCU05046, NCU10276, NCU09642, NCU01852, NCU01813, NCU05843, NCU04310, NCU07175, NCU00821, NCU07129, NCU08341, NCU06138, NCU00721, NCU09287, NCU01065, NCU04736, NCU05168, NCU00988, NCU08114, NCU05830, NCU09909, NCU06358, NCU06026, NCU06601, NCU02188, NCU06352, NCU02582, NCU03509,…	1484	119	4489	1.32182	0.995063	0.485142	18.4588
GOTERM_CC_DIRECT	GO:0033290~eukaryotic 48S preinitiation complex	10	0.361011	0.0162437	NCU06279, NCU02208, NCU05889, NCU07929, NCU01021, NCU07380, NCU08277, NCU07954, NCU03876, NCU09707	1484	14	4489	2.16067	0.99711	0.477757	20.12
GOTERM_BP_DIRECT	GO:0045493~xylan catabolic process	9	0.32491	0.0248089	NCU08785, NCU02855, NCU08226, NCU09923, NCU05924, NCU09491, NCU07225, NCU00709, NCU08189	1357	12	3887	2.14831	1	0.977196	32.4129
GOTERM_CC_DIRECT	GO:0005576~extracellular region	38	1.37184	0.0323813	NCU05955, NCU09416, NCU04395, NCU08760, NCU01393, NCU06512, NCU07760, NCU08785, NCU04870, NCU07353, NCU00710, NCU09764, NCU05121, NCU00836, NCU04554, NCU09680, NCU02470, NCU02240, NCU02916, NCU09524, NCU07200, NCU09525, NCU10045, NCU09491, NCU07225, NCU00326, NCU00122, NCU03801, NCU02909, NCU04528, NCU07340, NCU07035, NCU04494, NCU05618, NCU00762, NCU00206, NCU05159, NCU08176	1484	86	4489	1.3366	0.999992	0.691226	36.3345
GOTERM_CC_DIRECT	GO:0016282~eukaryotic 43S preinitiation complex	9	0.32491	0.0326487	NCU06279, NCU02208, NCU05889, NCU07929, NCU01021, NCU07380, NCU07954, NCU03876, NCU09707	1484	13	4489	2.09418	0.999993	0.659481	36.5754
GOTERM_MF_DIRECT	GO:0005351~sugar:proton symporter activity	20	0.722022	0.0334184	NCU00809, NCU00801, NCU00988, NCU08114, NCU10021, NCU01813, NCU06358, NCU06026, NCU05853, NCU08858, NCU04963, NCU02188, NCU00821, NCU02582, NCU05585, NCU06138, NCU09287, NCU01868, NCU01494, NCU09792	1587	38	4613	1.52986	1	0.993852	40.3827
GOTERM_CC_DIRECT	GO:0005852~eukaryotic translation initiation factor 3 complex	8	0.288809	0.0366214	NCU06279, NCU02208, NCU05889, NCU07929, NCU07380, NCU07954, NCU03876, NCU09707	1484	11	4489	2.19995	0.999998	0.67042	40.0564
GOTERM_BP_DIRECT	GO:0042273~ribosomal large subunit biogenesis	11	0.397112	0.0371485	NCU01257, NCU09528, NCU00105, NCU06090, NCU01301, NCU05293, NCU09488, NCU06021, NCU02066, NCU08121, NCU02477	1357	17	3887	1.85344	1	0.992429	44.5858
GOTERM_MF_DIRECT	GO:0005355~glucose transmembrane transporter activity	19	0.685921	0.0379211	NCU00809, NCU00801, NCU00988, NCU08114, NCU10021, NCU01813, NCU06358, NCU06026, NCU05853, NCU08858, NCU04963, NCU02188, NCU00821, NCU02582, NCU05585, NCU06138, NCU09287, NCU01868, NCU01494	1587	36	4613	1.53411	1	0.991981	44.4717
GOTERM_MF_DIRECT	GO:0008168~methyltransferase activity	13	0.469314	0.0410695	NCU02428, NCU03692, NCU07459, NCU00987, NCU00504, NCU00777, NCU10048, NCU04775, NCU02231, NCU00799, NCU09571, NCU00599, NCU01613	1587	22	4613	1.71762	1	0.988748	47.1735
GOTERM_BP_DIRECT	GO:0006364~rRNA processing	24	0.866426	0.041786	NCU03380, NCU00319, NCU04439, NCU07547, NCU07839, NCU03065, NCU06854, NCU01008, NCU00919, NCU00476, NCU09843, NCU07942, NCU04191, NCU04243, NCU03133, NCU01257, NCU09528, NCU10220, NCU02611, NCU04571, NCU01367, NCU07712, NCU02640, NCU08660	1357	48	3887	1.4322	1	0.991917	48.6047
GOTERM_BP_DIRECT	GO:0046323~glucose import	19	0.685921	0.0435646	NCU00809, NCU00801, NCU00988, NCU08114, NCU10021, NCU01813, NCU06358, NCU06026, NCU05853, NCU08858, NCU04963, NCU02188, NCU00821, NCU02582, NCU05585, NCU06138, NCU09287, NCU01868, NCU01494	1357	36	3887	1.51177	1	0.988542	50.0724
GOTERM_BP_DIRECT	GO:0035428~hexose transmembrane transport	19	0.685921	0.0435646	NCU00809, NCU00801, NCU00988, NCU08114, NCU10021, NCU01813, NCU06358, NCU06026, NCU05853, NCU08858, NCU04963, NCU02188, NCU00821, NCU02582, NCU05585, NCU06138, NCU09287, NCU01868, NCU01494	1357	36	3887	1.51177	1	0.988542	50.0724
GOTERM_CC_DIRECT	GO:0034388~Pwp2p-containing subcomplex of 90S preribosome	5	0.180505	0.0437267	NCU03018, NCU03628, NCU03794, NCU03051, NCU05894	1484	5	4489	3.02493	1	0.707078	45.8445
GOTERM_CC_DIRECT	GO:0030688~preribosome, small subunit precursor	5	0.180505	0.0437267	NCU00092, NCU01503, NCU08904, NCU04165, NCU07942	1484	5	4489	3.02493	1	0.707078	45.8445
GOTERM_BP_DIRECT	GO:0030245~cellulose catabolic process	9	0.32491	0.0450529	NCU07340, NCU05104, NCU09680, NCU04854, NCU05577, NCU09425, NCU05057, NCU07190, NCU08755	1357	13	3887	1.98305	1	0.984436	51.2703
GOTERM_MF_DIRECT	GO:0016791~phosphatase activity	7	0.252708	0.0490555	NCU09489, NCU03068, NCU03731, NCU01376, NCU06554, NCU08666, NCU04613	1587	9	4613	2.2608	1	0.990989	53.486
GOTERM_MF_DIRECT	GO:0004198~calcium-dependent cysteine-type endopeptidase activity	5	0.180505	0.0505535	NCU02738, NCU00317, NCU00251, NCU01151, NCU03355	1587	5	4613	2.90674	1	0.986663	54.5886
GOTERM_MF_DIRECT	GO:0000287~magnesium ion binding	25	0.902527	0.051474	NCU06970, NCU01786, NCU07458, NCU01270, NCU09567, NCU03068, NCU03731, NCU00581, NCU04069, NCU00951, NCU02734, NCU05542, NCU02105, NCU06348, NCU07308, NCU10058, NCU05254, NCU10776, NCU08771, NCU06281, NCU10893, NCU08666, NCU06191, NCU06232, NCU04613	1587	52	4613	1.39747	1	0.980902	55.2539
GOTERM_BP_DIRECT	GO:0017183~peptidyl-diphthamide biosynthetic process from peptidyl-histidine	5	0.180505	0.0532728	NCU07266, NCU02805, NCU09465, NCU08503, NCU06168	1357	5	3887	2.86441	1	0.988824	57.416
GOTERM_CC_DIRECT	GO:0005777~peroxisome	9	0.32491	0.0545221	NCU08828, NCU05169, NCU03542, NCU09808, NCU04301, NCU06643, NCU04796, NCU05558, NCU00299	1484	14	4489	1.9446	1	0.760608	53.6544
GOTERM_BP_DIRECT	GO:0000460~maturation of 5.8S rRNA	6	0.216606	0.0546872	NCU00981, NCU00404, NCU04150, NCU03764, NCU11261, NCU07795	1357	7	3887	2.45521	1	0.985477	58.3974
GOTERM_CC_DIRECT	GO:0019013~viral nucleocapsid	13	0.469314	0.0630461	NCU03018, NCU08951, NCU01008, NCU07331, NCU01502, NCU01367, NCU03952, NCU03778, NCU07683, NCU02780, NCU03625, NCU03085, NCU04243	1484	24	4489	1.63851	1	0.787728	59.0685
GOTERM_CC_DIRECT	GO:0000176~nuclear exosome (RNase complex)	8	0.288809	0.0632633	NCU03065, NCU02256, NCU04009, NCU03159, NCU00812, NCU01806, NCU00693, NCU04155	1484	12	4489	2.01662	1	0.767343	59.1985
GOTERM_CC_DIRECT	GO:0005736~DNA-directed RNA polymerase I complex	8	0.288809	0.0632633	NCU02533, NCU07166, NCU08030, NCU04508, NCU00419, NCU05305, NCU11012, NCU06485	1484	12	4489	2.01662	1	0.767343	59.1985
GOTERM_BP_DIRECT	GO:0000470~maturation of LSU-rRNA	10	0.361011	0.0653653	NCU01331, NCU00981, NCU08951, NCU00404, NCU04150, NCU03764, NCU11321, NCU11261, NCU07795, NCU09094	1357	16	3887	1.79025	1	0.990864	65.1514
GOTERM_MF_DIRECT	GO:0004029~aldehyde dehydrogenase (NAD) activity	8	0.288809	0.0772582	NCU04013, NCU07053, NCU00715, NCU08669, NCU03076, NCU00378, NCU09266, NCU03415	1587	12	4613	1.93783	1	0.995809	70.5815
GOTERM_BP_DIRECT	GO:0006360~transcription from RNA polymerase I promoter	8	0.288809	0.0829599	NCU02533, NCU07166, NCU08030, NCU04508, NCU00419, NCU05305, NCU11012, NCU06485	1357	12	3887	1.9096	1	0.99625	74.0894
GOTERM_BP_DIRECT	GO:0006950~response to stress	8	0.288809	0.0829599	NCU05649, NCU05068, NCU04807, NCU02363, NCU03863, NCU00004, NCU04142, NCU02413	1357	12	3887	1.9096	1	0.99625	74.0894
GOTERM_CC_DIRECT	GO:0005654~nucleoplasm	6	0.216606	0.0847472	NCU04047, NCU10776, NCU01249, NCU00925, NCU02066, NCU03764	1484	8	4489	2.2687	1	0.844273	70.3205
GOTERM_MF_DIRECT	GO:0016301~kinase activity	17	0.613718	0.0856158	NCU08007, NCU06970, NCU01786, NCU02726, NCU01270, NCU06593, NCU07937, NCU06337, NCU07460, NCU08772, NCU05254, NCU01701, NCU01389, NCU04597, NCU00873, NCU08671, NCU00567	1587	34	4613	1.45337	1	0.996252	74.3853
GOTERM_MF_DIRECT	GO:0003743~translation initiation factor activity	22	0.794224	0.0917438	NCU05889, NCU09546, NCU00366, NCU03717, NCU07929, NCU07420, NCU00444, NCU08277, NCU00457, NCU07954, NCU02208, NCU06279, NCU02076, NCU01021, NCU07380, NCU02810, NCU07757, NCU07437, NCU02984, NCU07289, NCU03876, NCU09707	1587	47	4613	1.3606	1	0.99609	76.8767
GOTERM_BP_DIRECT	GO:0008654~phospholipid biosynthetic process	7	0.252708	0.0933076	NCU06666, NCU02302, NCU04699, NCU05985, NCU01141, NCU08045, NCU01993	1357	10	3887	2.00508	1	0.997252	78.2918
GOTERM_MF_DIRECT	GO:0000166~nucleotide binding	45	1.62455	0.0968995	NCU07883, NCU04273, NCU08668, NCU01785, NCU01310, NCU00457, NCU03117, NCU06739, NCU02404, NCU04799, NCU02837, NCU04191, NCU03491, NCU03007, NCU02467, NCU00496, NCU03226, NCU02256, NCU06217, NCU00210, NCU05602, NCU01184, NCU07421, NCU01793, NCU08518, NCU03169, NCU07574, NCU01972, NCU00643, NCU08295, NCU04182, NCU08435, NCU09378, NCU07069, NCU02159, NCU09048, NCU02208, NCU07878, NCU03092, NCU02611,…	1587	108	4613	1.21114	1	0.995716	78.7955
GOTERM_CC_DIRECT	GO:0035267~NuA4 histone acetyltransferase complex	5	0.180505	0.097084	NCU06854, NCU05281, NCU06787, NCU03482, NCU02555	1484	6	4489	2.52078	1	0.868071	75.3616
GOTERM_CC_DIRECT	GO:0034399~nuclear periphery	5	0.180505	0.097084	NCU01257, NCU02357, NCU02011, NCU09062, NCU05650	1484	6	4489	2.52078	1	0.868071	75.3616
GOTERM_MF_DIRECT	GO:0009982~pseudouridine synthase activity	6	0.216606	0.0989085	NCU01290, NCU01784, NCU06428, NCU04153, NCU01725, NCU01777	1587	8	4613	2.18006	1	0.994486	79.502
Go enrichment of 622 down-regulared genes
Category	Term	Count	%	PValue	Genes	List Total	Pop Hits	Pop Total	Fold Enrichment	Bonferroni	Benjamini	FDR
GOTERM_CC_DIRECT	GO:0016021~integral component of membrane	124	20.9814	4.85433e-07	NCU03045, NCU08280, NCU08621, NCU01846, NCU06185, NCU11223, NCU08425, NCU06660, NCU08895, NCU05189, NCU07237, NCU07955, NCU09820, NCU05647, NCU04515, NCU00717, NCU01568, NCU02624, NCU07769, NCU02956, NCU03255, NCU04817, NCU05338, NCU02138, NCU09098, NCU06231, NCU00306, NCU07806, NCU11046, NCU05652, NCU03601, NCU09830, NCU05844, NCU09400, NCU08172, NCU02690, NCU00247, NCU06986, NCU03240, NCU00248,…	254	1523	4489	1.43892	3.64068e-05	3.64068e-05	0.000509463
GOTERM_BP_DIRECT	GO:0031505~fungal-type cell wall organization	11	1.86125	1.11101e-06	NCU06781, NCU08909, NCU04350, NCU07253, NCU09326, NCU00586, NCU08936, NCU07491, NCU03601, NCU01162, NCU02668	206	29	3887	7.15718	0.000271049	0.000271049	0.00143778
GOTERM_CC_DIRECT	GO:0009277~fungal-type cell wall	8	1.35364	1.98707e-05	NCU08457, NCU06781, NCU08909, NCU07253, NCU09326, NCU08936, NCU01162, NCU02668	254	17	4489	8.31681	0.0014892	0.00074488	0.0208524
GOTERM_CC_DIRECT	GO:0005886~plasma membrane	19	3.21489	0.00012039	NCU04195, NCU04262, NCU06137, NCU08936, NCU06660, NCU08895, NCU03601, NCU09830, NCU02948, NCU02540, NCU00007, NCU05435, NCU03641, NCU00586, NCU02624, NCU03592, NCU04639, NCU07491, NCU01735	254	121	4489	2.77514	0.00898917	0.00300541	0.126278
GOTERM_MF_DIRECT	GO:0042124~1,3-beta-glucanosyltransferase activity	6	1.01523	0.000147851	NCU06781, NCU08909, NCU07253, NCU09326, NCU09175, NCU01162	278	10	4613	9.95612	0.0392783	0.0392783	0.194333
GOTERM_MF_DIRECT	GO:0016491~oxidoreductase activity	24	4.06091	0.000170607	NCU06402, NCU11395, NCU07267, NCU09040, NCU01754, NCU09821, NCU07234, NCU09473, NCU09535, NCU10051, NCU08699, NCU09285, NCU01233, NCU10775, NCU04823, NCU01861, NCU07117, NCU10865, NCU04443, NCU00552, NCU02476, NCU08048, NCU04539, NCU00236	278	170	4613	2.34262	0.0451858	0.022854	0.224213
GOTERM_MF_DIRECT	GO:0050278~sedoheptulose-bisphosphatase activity	4	0.676819	0.000819048	NCU01845, NCU05116, NCU11201, NCU04016	278	4	4613	16.5935	0.199127	0.0713447	1.07217
GOTERM_MF_DIRECT	GO:0005506~iron ion binding	12	2.03046	0.000975834	NCU08197, NCU06137, NCU06402, NCU02624, NCU00520, NCU06465, NCU10011, NCU00147, NCU03492, NCU06207, NCU04983, NCU09115	278	62	4613	3.21165	0.232472	0.0640049	1.27619
GOTERM_BP_DIRECT	GO:0006633~fatty acid biosynthetic process	6	1.01523	0.00105269	NCU09886, NCU06402, NCU06465, NCU03492, NCU06207, NCU04983	206	16	3887	7.07585	0.226625	0.120583	1.35379
GOTERM_BP_DIRECT	GO:0006696~ergosterol biosynthetic process	6	1.01523	0.00105269	NCU00585, NCU06402, NCU02624, NCU06207, NCU04983, NCU04921	206	16	3887	7.07585	0.226625	0.120583	1.35379
GOTERM_BP_DIRECT	GO:0071970~fungal-type cell wall (1->3)-beta-D-glucan biosynthetic process	4	0.676819	0.00133616	NCU06781, NCU08909, NCU07253, NCU01162	206	5	3887	15.0951	0.278368	0.103042	1.71543
GOTERM_CC_DIRECT	GO:0031362~anchored component of external side of plasma membrane	4	0.676819	0.00162556	NCU06781, NCU08909, NCU07253, NCU01162	254	5	4489	14.1386	0.114866	0.0300435	1.69293
GOTERM_MF_DIRECT	GO:0010181~FMN binding	6	1.01523	0.0148196	NCU07267, NCU08269, NCU04452, NCU04539, NCU02948, NCU00236	278	25	4613	3.98245	0.982511	0.5548	17.8333
GOTERM_BP_DIRECT	GO:0019805~quinolinate biosynthetic process	3	0.507614	0.0154771	NCU09183, NCU03282, NCU06924	206	4	3887	14.1517	0.977762	0.613832	18.279
GOTERM_BP_DIRECT	GO:0043420~anthranilate metabolic process	3	0.507614	0.0154771	NCU09183, NCU03282, NCU06924	206	4	3887	14.1517	0.977762	0.613832	18.279
GOTERM_MF_DIRECT	GO:0004527~exonuclease activity	4	0.676819	0.0187447	NCU09759, NCU00684, NCU03682, NCU09788	278	10	4613	6.63741	0.994072	0.574578	22.0374
GOTERM_BP_DIRECT	GO:0034354~'de novo' NAD biosynthetic process from tryptophan	3	0.507614	0.0249044	NCU09183, NCU03282, NCU06924	206	5	3887	11.3214	0.997874	0.707918	27.8466
GOTERM_BP_DIRECT	GO:0006096~glycolytic process	4	0.676819	0.0279244	NCU07914, NCU01528, NCU10042, NCU01870	206	13	3887	5.80583	0.999003	0.683917	30.6858
GOTERM_BP_DIRECT	GO:0006783~heme biosynthetic process	3	0.507614	0.0360722	NCU02771, NCU08291, NCU02395	206	6	3887	9.43447	0.999872	0.722133	37.8394
GOTERM_BP_DIRECT	GO:0018298~protein-chromophore linkage	3	0.507614	0.0360722	NCU02356, NCU00582, NCU08626	206	6	3887	9.43447	0.999872	0.722133	37.8394
GOTERM_MF_DIRECT	GO:0050662~coenzyme binding	4	0.676819	0.0390966	NCU00884, NCU04442, NCU00360, NCU08549	278	13	4613	5.1057	0.99998	0.78647	40.8248
GOTERM_MF_DIRECT	GO:0020037~heme binding	10	1.69205	0.0396665	NCU07352, NCU08197, NCU06137, NCU02624, NCU09210, NCU10011, NCU03492, NCU08791, NCU10051, NCU09115	278	77	4613	2.155	0.999983	0.746167	41.2848
GOTERM_MF_DIRECT	GO:0019825~oxygen binding	3	0.507614	0.045885	NCU07352, NCU10051, NCU09115	278	6	4613	8.29676	0.999997	0.756917	46.0945
GOTERM_BP_DIRECT	GO:0000079~regulation of cyclin-dependent protein serine/threonine kinase activity	3	0.507614	0.0628147	NCU04847, NCU07293, NCU09085	206	8	3887	7.07585	1	0.861746	56.8098
GOTERM_MF_DIRECT	GO:0008289~lipid binding	3	0.507614	0.0791264	NCU04669, NCU02250, NCU02540	278	8	4613	6.22257	1	0.892892	66.1915
GOTERM_MF_DIRECT	GO:0000287~magnesium ion binding	7	1.18443	0.0892051	NCU10042, NCU03592, NCU09789, NCU01870, NCU06978, NCU08703, NCU02193	278	52	4613	2.23374	1	0.899937	70.7484
GOTERM_BP_DIRECT	GO:0048315~conidium formation	3	0.507614	0.0942364	NCU09235, NCU08726, NCU08791	206	10	3887	5.66068	1	0.931668	72.221
GOTERM_MF_DIRECT	GO:0003993~acid phosphatase activity	3	0.507614	0.0978134	NCU06460, NCU08643, NCU03255	278	9	4613	5.53118	1	0.902177	74.1838
Go enrichment of 3514 responded genes
Category	Term	Count	%	PValue	Genes	List Total	Pop Hits	Pop Total	Fold Enrichment	Bonferroni	Benjamini	FDR
GOTERM_CC_DIRECT	GO:0005730~nucleolus	50	1.48765	0.000121746	NCU02428, NCU08668, NCU00919, NCU01844, NCU09380, NCU07956, NCU00404, NCU07331, NCU00812, NCU01524, NCU02066, NCU07712, NCU03380, NCU07041, NCU08553, NCU00092, NCU05293, NCU08595, NCU02159, NCU01022, NCU00105, NCU04047, NCU03241, NCU04159, NCU07547, NCU00981, NCU03066, NCU02406, NCU09843, NCU06021, NCU03133, NCU01257, NCU02546, NCU00151, NCU06090, NCU04150, NCU01502, NCU02640, NCU02748, NCU03268,…	1738	83	4489	1.55594	0.0446309	0.0446309	0.168085
GOTERM_BP_DIRECT	GO:0006633~fatty acid biosynthetic process	15	0.446296	0.000130622	NCU06694, NCU08535, NCU06180, NCU08976, NCU06783, NCU06402, NCU06785, NCU03492, NCU04983, NCU09886, NCU07307, NCU07308, NCU06465, NCU06207, NCU00056	1563	16	3887	2.33145	0.121426	0.121426	0.205942
GOTERM_MF_DIRECT	GO:0030248~cellulose binding	17	0.505802	0.000929663	NCU05955, NCU09680, NCU09416, NCU08760, NCU02240, NCU09524, NCU02916, NCU07225, NCU07760, NCU07340, NCU00762, NCU00206, NCU00710, NCU09764, NCU05121, NCU00836, NCU05159	1865	21	4613	2.00232	0.552287	0.552287	1.43178
GOTERM_CC_DIRECT	GO:0005737~cytoplasm	265	7.88456	0.00109683	NCU04274, NCU06764, NCU05642, NCU06621, NCU00611, NCU00043, NCU04799, NCU03610, NCU02564, NCU00717, NCU06372, NCU04612, NCU06232, NCU06104, NCU06766, NCU04613, NCU02765, NCU00522, NCU00443, NCU00629, NCU00520, NCU07774, NCU05650, NCU00304, NCU04105, NCU10046, NCU02241, NCU05252, NCU02357, NCU00720, NCU00915, NCU02963, NCU06758, NCU07365, NCU01198, NCU02688, NCU09465, NCU00317, NCU00410, NCU03731,…	1738	593	4489	1.15423	0.337368	0.185978	1.50488
GOTERM_CC_DIRECT	GO:0005829~cytosol	87	2.58852	0.00110616	NCU09489, NCU06578, NCU01083, NCU03526, NCU01845, NCU01669, NCU00963, NCU00519, NCU04797, NCU03813, NCU08040, NCU04790, NCU06625, NCU04936, NCU03084, NCU09545, NCU05116, NCU07574, NCU00950, NCU02156, NCU00796, NCU05298, NCU06549, NCU06996, NCU04104, NCU09873, NCU07941, NCU07361, NCU10106, NCU00651, NCU05050, NCU05983, NCU04728, NCU04569, NCU08791, NCU02657, NCU02055, NCU00065, NCU05979, NCU00319,…	1738	171	4489	1.31408	0.339686	0.129203	1.51759
GOTERM_BP_DIRECT	GO:0006810~transport	28	0.833085	0.00217512	NCU00316, NCU02363, NCU08895, NCU02423, NCU03710, NCU01689, NCU06717, NCU10034, NCU05649, NCU02802, NCU05068, NCU01568, NCU03561, NCU05390, NCU07478, NCU07263, NCU01810, NCU03556, NCU07574, NCU08278, NCU02352, NCU07927, NCU06922, NCU03800, NCU03863, NCU07738, NCU04003, NCU07736	1563	43	3887	1.61937	0.884432	0.660046	3.37803
GOTERM_BP_DIRECT	GO:0005975~carbohydrate metabolic process	64	1.9042	0.00287789	NCU09652, NCU01900, NCU00087, NCU09486, NCU05955, NCU05956, NCU09416, NCU07860, NCU08760, NCU04798, NCU07760, NCU06730, NCU00130, NCU02997, NCU00810, NCU09582, NCU00710, NCU09764, NCU03086, NCU04936, NCU04554, NCU02322, NCU02916, NCU02240, NCU07326, NCU10107, NCU09508, NCU00762, NCU00720, NCU00206, NCU05882, NCU04623, NCU00890, NCU09647, NCU08179, NCU05159, NCU06211, NCU00061, NCU09904, NCU04674,…	1563	119	3887	1.33748	0.942507	0.614044	4.4464
GOTERM_MF_DIRECT	GO:0000287~magnesium ion binding	32	0.952098	0.00381419	NCU06970, NCU01786, NCU07458, NCU01270, NCU03731, NCU03068, NCU00581, NCU02734, NCU10058, NCU09789, NCU01870, NCU06978, NCU08666, NCU06191, NCU06232, NCU08703, NCU04613, NCU09567, NCU04069, NCU00951, NCU02105, NCU05542, NCU10042, NCU06348, NCU07308, NCU08771, NCU03592, NCU10776, NCU05254, NCU06281, NCU10893, NCU02193	1865	52	4613	1.52213	0.963182	0.808119	5.75316
GOTERM_MF_DIRECT	GO:0004553~hydrolase activity, hydrolyzing O-glycosyl compounds	35	1.04136	0.00761351	NCU09652, NCU01900, NCU00061, NCU05104, NCU09486, NCU09904, NCU05955, NCU05956, NCU04854, NCU04674, NCU09416, NCU08760, NCU07760, NCU02184, NCU06730, NCU00810, NCU04203, NCU02583, NCU00710, NCU09764, NCU00836, NCU05789, NCU09680, NCU02240, NCU02916, NCU09524, NCU04885, NCU07326, NCU00206, NCU04431, NCU05882, NCU06861, NCU05159, NCU05057, NCU07190	1865	60	4613	1.44285	0.998644	0.889317	11.1749
GOTERM_CC_DIRECT	GO:0005666~DNA-directed RNA polymerase III complex	13	0.38679	0.00770336	NCU02533, NCU00727, NCU01245, NCU01785, NCU08030, NCU03560, NCU04508, NCU01772, NCU00419, NCU05305, NCU11012, NCU06539, NCU07656	1738	17	4489	1.97512	0.944974	0.515669	10.1339
GOTERM_BP_DIRECT	GO:0006383~transcription from RNA polymerase III promoter	11	0.327284	0.0080082	NCU02533, NCU00727, NCU01245, NCU08030, NCU03560, NCU04508, NCU01772, NCU00419, NCU05305, NCU11012, NCU06539	1563	13	3887	2.10429	0.999654	0.86358	11.917
GOTERM_CC_DIRECT	GO:0030687~preribosome, large subunit precursor	19	0.565308	0.00895568	NCU07547, NCU00981, NCU01301, NCU06214, NCU11261, NCU07942, NCU08121, NCU07795, NCU01257, NCU00105, NCU04503, NCU00404, NCU04150, NCU00925, NCU02640, NCU03764, NCU02477, NCU01458, NCU09094	1738	29	4489	1.69221	0.965731	0.490692	11.6883
GOTERM_CC_DIRECT	GO:0005576~extracellular region	45	1.33889	0.0118819	NCU05955, NCU09416, NCU08760, NCU04395, NCU01393, NCU06512, NCU07760, NCU02184, NCU07351, NCU08785, NCU02369, NCU04870, NCU07353, NCU09175, NCU00710, NCU09764, NCU05121, NCU00836, NCU04554, NCU08457, NCU09680, NCU02470, NCU02240, NCU02916, NCU09524, NCU07200, NCU09525, NCU10045, NCU09491, NCU07225, NCU00326, NCU00122, NCU03801, NCU02909, NCU04528, NCU07340, NCU07035, NCU09326, NCU04494, NCU05618,…	1738	86	4489	1.35149	0.988694	0.526246	15.2238
GOTERM_MF_DIRECT	GO:0030515~snoRNA binding	9	0.267777	0.0131034	NCU03628, NCU03794, NCU06943, NCU01008, NCU03396, NCU03051, NCU05894, NCU01367, NCU04243	1865	10	4613	2.22611	0.999989	0.9421	18.4956
GOTERM_CC_DIRECT	GO:0005777~peroxisome	11	0.327284	0.0133848	NCU08828, NCU05169, NCU03542, NCU07853, NCU09808, NCU04301, NCU06643, NCU08332, NCU04796, NCU05558, NCU00299	1738	14	4489	2.02939	0.993611	0.514164	16.9881
GOTERM_CC_DIRECT	GO:0032040~small-subunit processome	20	0.595061	0.013954	NCU01331, NCU04159, NCU07041, NCU02748, NCU02428, NCU03628, NCU03794, NCU01008, NCU03051, NCU03396, NCU04243, NCU03133, NCU03018, NCU01022, NCU06943, NCU07331, NCU05894, NCU01502, NCU01367, NCU03952	1738	32	4489	1.61428	0.994854	0.482476	17.6474
GOTERM_BP_DIRECT	GO:0045493~xylan catabolic process	10	0.29753	0.0156612	NCU08785, NCU07351, NCU02855, NCU08226, NCU09923, NCU05924, NCU09491, NCU07225, NCU00709, NCU08189	1563	12	3887	2.0724	1	0.956221	22.0508
GOTERM_MF_DIRECT	GO:0003899~DNA-directed RNA polymerase activity	18	0.535555	0.0235884	NCU08553, NCU01785, NCU03782, NCU01772, NCU00419, NCU09378, NCU06539, NCU06485, NCU02533, NCU00727, NCU01245, NCU07166, NCU01515, NCU03560, NCU04508, NCU05120, NCU05305, NCU11012	1865	28	4613	1.59008	1	0.983835	30.9352
GOTERM_CC_DIRECT	GO:0005665~DNA-directed RNA polymerase II, core complex	10	0.29753	0.0253762	NCU08553, NCU01515, NCU08030, NCU03782, NCU04508, NCU05120, NCU05305, NCU11012, NCU09378, NCU02589	1738	13	4489	1.98681	0.999935	0.657331	29.8931
GOTERM_BP_DIRECT	GO:0030245~cellulose catabolic process	10	0.29753	0.0328804	NCU07340, NCU03641, NCU05104, NCU09680, NCU04854, NCU05577, NCU09425, NCU05057, NCU07190, NCU08755	1563	13	3887	1.91299	1	0.996002	40.9995
GOTERM_CC_DIRECT	GO:0005886~plasma membrane	58	1.72568	0.0344645	NCU00430, NCU06043, NCU03616, NCU02363, NCU05577, NCU09869, NCU06660, NCU08895, NCU03711, NCU07270, NCU03611, NCU00007, NCU05649, NCU05435, NCU02624, NCU07005, NCU01735, NCU09937, NCU06137, NCU03601, NCU09830, NCU08755, NCU03641, NCU09243, NCU06281, NCU00829, NCU04195, NCU03770, NCU03278, NCU04251, NCU08936, NCU09980, NCU02948, NCU02540, NCU05835, NCU04952, NCU05068, NCU08067, NCU00586, NCU00290,…	1738	121	4489	1.23806	0.999998	0.731584	38.4054
GOTERM_BP_DIRECT	GO:0001731~formation of translation preinitiation complex	11	0.327284	0.0347095	NCU06279, NCU02208, NCU05889, NCU07929, NCU01021, NCU07380, NCU00457, NCU02810, NCU07954, NCU03876, NCU09707	1563	15	3887	1.82372	1	0.99327	42.7361
GOTERM_CC_DIRECT	GO:0005887~integral component of plasma membrane	57	1.69592	0.03664	NCU02755, NCU00809, NCU03468, NCU03257, NCU04070, NCU05897, NCU01846, NCU10675, NCU05853, NCU08858, NCU08147, NCU09207, NCU03292, NCU05046, NCU10276, NCU01633, NCU09642, NCU01852, NCU01813, NCU05843, NCU04310, NCU07175, NCU00821, NCU07129, NCU08341, NCU06138, NCU00721, NCU09287, NCU02195, NCU01065, NCU04736, NCU05168, NCU00988, NCU08114, NCU05830, NCU09909, NCU06358, NCU06026, NCU06601, NCU02188,…	1738	119	4489	1.23717	0.999999	0.719883	40.2955
GOTERM_CC_DIRECT	GO:0000176~nuclear exosome (RNase complex)	9	0.267777	0.0468676	NCU03268, NCU03065, NCU02256, NCU04009, NCU03159, NCU00812, NCU01806, NCU00693, NCU04155	1738	12	4489	1.93714	1	0.77688	48.4819
GOTERM_CC_DIRECT	GO:0033290~eukaryotic 48S preinitiation complex	10	0.29753	0.0469607	NCU06279, NCU02208, NCU05889, NCU07929, NCU01021, NCU07380, NCU08277, NCU07954, NCU03876, NCU09707	1738	14	4489	1.8449	1	0.750295	48.5514
GOTERM_BP_DIRECT	GO:0000462~maturation of SSU-rRNA from tricistronic rRNA transcript (SSU-rRNA, 5.8S rRNA, LSU-rRNA)	18	0.535555	0.0496024	NCU07041, NCU02748, NCU04159, NCU02428, NCU00092, NCU03628, NCU03794, NCU03051, NCU03907, NCU04787, NCU03018, NCU01022, NCU00151, NCU03824, NCU07331, NCU05894, NCU01502, NCU01503	1563	30	3887	1.49213	1	0.998168	55.1964
GOTERM_BP_DIRECT	GO:0008654~phospholipid biosynthetic process	8	0.238024	0.0559191	NCU11367, NCU06666, NCU02302, NCU04699, NCU01141, NCU05985, NCU08045, NCU01993	1563	10	3887	1.98951	1	0.998229	59.6719
GOTERM_BP_DIRECT	GO:0006446~regulation of translational initiation	11	0.327284	0.0597708	NCU04344, NCU06279, NCU02208, NCU05889, NCU11341, NCU01021, NCU07380, NCU07954, NCU03876, NCU09707, NCU01198	1563	16	3887	1.70973	1	0.997774	62.1916
GOTERM_MF_DIRECT	GO:0030246~carbohydrate binding	13	0.38679	0.0605867	NCU08398, NCU05495, NCU02786, NCU00810, NCU04203, NCU02583, NCU05956, NCU07817, NCU09705, NCU04674, NCU09425, NCU04798, NCU10063	1865	20	4613	1.60775	1	0.999877	62.0564
GOTERM_MF_DIRECT	GO:0051287~NAD binding	17	0.505802	0.0767116	NCU06559, NCU07931, NCU03651, NCU08228, NCU03139, NCU01528, NCU00780, NCU09783, NCU03813, NCU01439, NCU00742, NCU05050, NCU01078, NCU11370, NCU06232, NCU04936, NCU00567	1865	29	4613	1.44996	1	0.999947	70.9899
GOTERM_CC_DIRECT	GO:0030688~preribosome, small subunit precursor	5	0.148765	0.0772776	NCU00092, NCU01503, NCU08904, NCU04165, NCU07942	1738	5	4489	2.58285	1	0.884014	67.0855
GOTERM_CC_DIRECT	GO:0034388~Pwp2p-containing subcomplex of 90S preribosome	5	0.148765	0.0772776	NCU03018, NCU03628, NCU03794, NCU03051, NCU05894	1738	5	4489	2.58285	1	0.884014	67.0855
GOTERM_CC_DIRECT	GO:0016282~eukaryotic 43S preinitiation complex	9	0.267777	0.0812538	NCU06279, NCU02208, NCU05889, NCU07929, NCU01021, NCU07380, NCU07954, NCU03876, NCU09707	1738	13	4489	1.78813	1	0.879804	68.9921
GOTERM_CC_DIRECT	GO:0005852~eukaryotic translation initiation factor 3 complex	8	0.238024	0.0839454	NCU06279, NCU02208, NCU05889, NCU07929, NCU07380, NCU07954, NCU03876, NCU09707	1738	11	4489	1.87844	1	0.871905	70.224
GOTERM_BP_DIRECT	GO:0046323~glucose import	20	0.595061	0.0852239	NCU01633, NCU00809, NCU00801, NCU00988, NCU08114, NCU10021, NCU01813, NCU06358, NCU06026, NCU05853, NCU08858, NCU04963, NCU02188, NCU00821, NCU02582, NCU05585, NCU06138, NCU09287, NCU01868, NCU01494	1563	36	3887	1.3816	1	0.999673	75.4817
GOTERM_BP_DIRECT	GO:0035428~hexose transmembrane transport	20	0.595061	0.0852239	NCU01633, NCU00809, NCU00801, NCU00988, NCU08114, NCU10021, NCU01813, NCU06358, NCU06026, NCU05853, NCU08858, NCU04963, NCU02188, NCU00821, NCU02582, NCU05585, NCU06138, NCU09287, NCU01868, NCU01494	1563	36	3887	1.3816	1	0.999673	75.4817
GOTERM_MF_DIRECT	GO:0005351~sugar:proton symporter activity	21	0.624814	0.0854085	NCU01633, NCU00809, NCU00801, NCU00988, NCU08114, NCU10021, NCU01813, NCU06358, NCU06026, NCU05853, NCU08858, NCU04963, NCU02188, NCU00821, NCU02582, NCU05585, NCU06138, NCU09287, NCU01868, NCU01494, NCU09792	1865	38	4613	1.36691	1	0.999935	74.9493
GOTERM_BP_DIRECT	GO:0017183~peptidyl-diphthamide biosynthetic process from peptidyl-histidine	5	0.148765	0.0883312	NCU07266, NCU02805, NCU09465, NCU08503, NCU06168	1563	5	3887	2.48688	1	0.999518	76.7636
GOTERM_MF_DIRECT	GO:0005355~glucose transmembrane transporter activity	20	0.595061	0.0898021	NCU01633, NCU00809, NCU00801, NCU00988, NCU08114, NCU10021, NCU01813, NCU06358, NCU06026, NCU05853, NCU08858, NCU04963, NCU02188, NCU00821, NCU02582, NCU05585, NCU06138, NCU09287, NCU01868, NCU01494	1865	36	4613	1.37414	1	0.999881	76.7516
GOTERM_MF_DIRECT	GO:0004198~calcium-dependent cysteine-type endopeptidase activity	5	0.148765	0.0900893	NCU02738, NCU00317, NCU00251, NCU01151, NCU03355	1865	5	4613	2.47346	1	0.999713	76.8651
GOTERM_BP_DIRECT	GO:0006366~transcription from RNA polymerase II promoter	12	0.357037	0.0906824	NCU00499, NCU06859, NCU01515, NCU08030, NCU03782, NCU04508, NCU03273, NCU02615, NCU05120, NCU05305, NCU11012, NCU04855	1563	19	3887	1.57066	1	0.999287	77.6915
GOTERM_BP_DIRECT	GO:0042273~ribosomal large subunit biogenesis	11	0.327284	0.0940873	NCU01257, NCU09528, NCU00105, NCU06090, NCU01301, NCU05293, NCU09488, NCU06021, NCU02066, NCU08121, NCU02477	1563	17	3887	1.60916	1	0.999083	78.9739
GOTERM_BP_DIRECT	GO:0000460~maturation of 5.8S rRNA	6	0.178518	0.0978592	NCU00981, NCU00404, NCU04150, NCU03764, NCU11261, NCU07795	1563	7	3887	2.13162	1	0.998891	80.3138
GOTERM_BP_DIRECT	GO:0006749~glutathione metabolic process	9	0.267777	0.0997471	NCU00549, NCU01347, NCU04569, NCU02888, NCU03826, NCU10521, NCU00796, NCU04130, NCU03339	1563	13	3887	1.72169	1	0.998509	80.954
